# Supplementary figures and images for: Anatomical Study of the Dorsal Nasal Artery to Prevent Visual Complications during Dorsal Nasal Augmentation
Source: PubMed Central journal article supplement — Plast Reconstr Surg Glob Open. 2021 Nov 16;9(11):e3924. doi: 10.1097/GOX.0000000000003924 (PMC8594662; doi:10.1097/gox.0000000000003924), 2021-11-16

**A**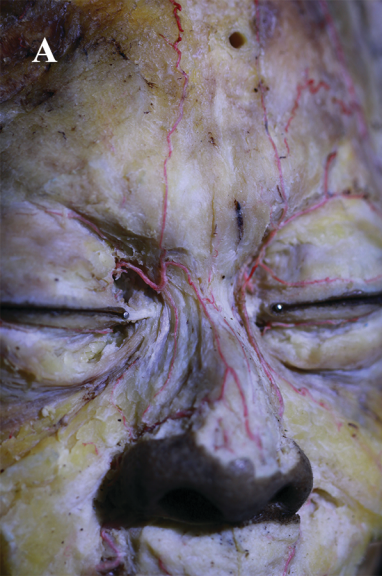**B**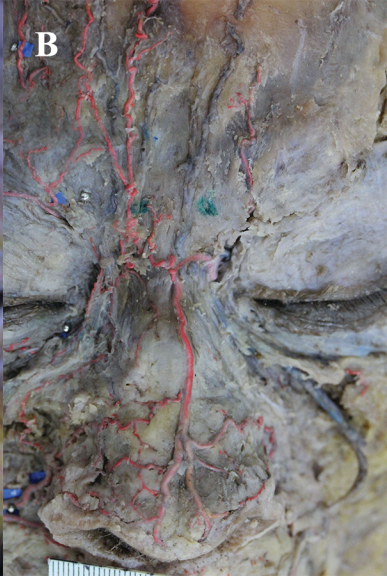

Supplement: gox-9-e3924-s001.pdf [file gox-9-e3924-s001.pdf]

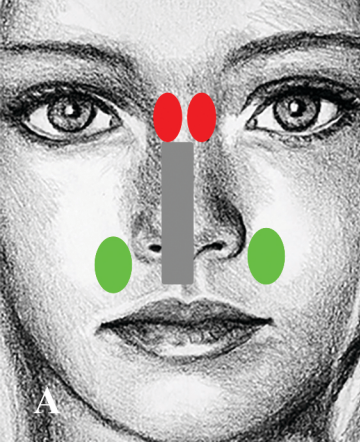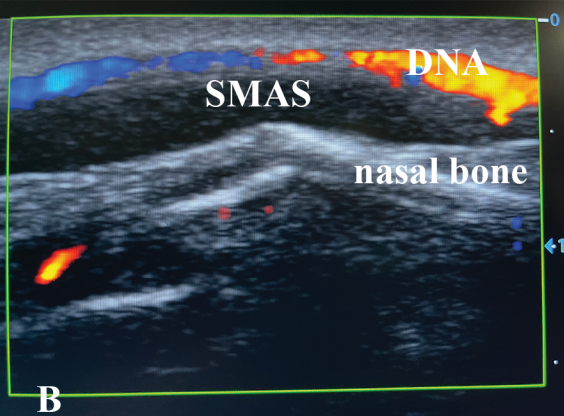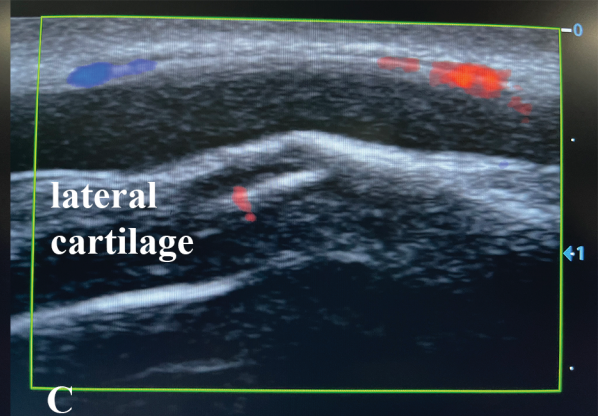

Supplement: gox-9-e3924-s002.pdf [file gox-9-e3924-s002.pdf]
